# Supplementary material for: Transcriptomic profiling of mature embryo from an elite super-hybrid rice LYP9 and its parental lines
Source: PubMed Central journal article supplement (PMC2596138; doi:10.1186/1471-2229-8-114), 2008-11-11

Additional file 7: GO classification of universally-expressed genes among embryo and other tissues from SAGE data

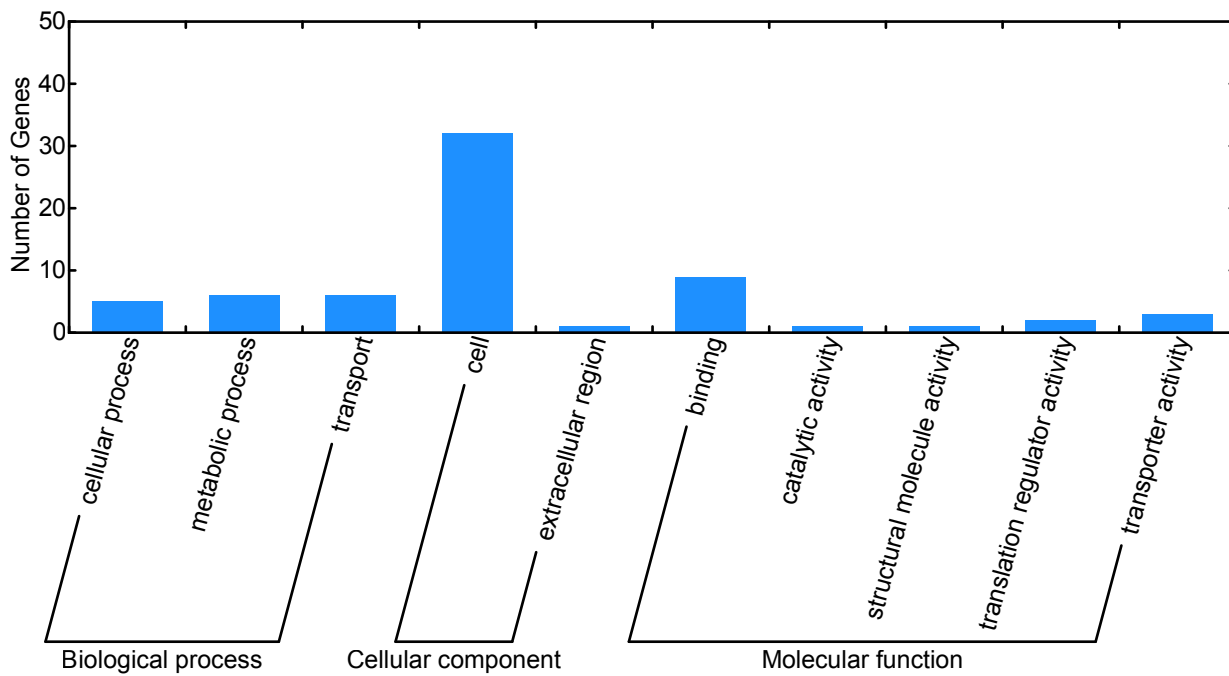

Supplement: 1471-2229-8-114-S7.pdf [file 1471-2229-8-114-S7.pdf]
